# Supplementary material for: Environmental Particulate Matter Levels during 2017 Large Forest Fires and Megafires in the Center Region of Portugal: A Public Health Concern?
Source: PubMed Central journal article supplement (PMC7036973; doi:10.3390/ijerph17031032), 2020-02-06
Supplement: ijerph-17-01032-s001.pdf [file ijerph-17-01032-s001.pdf]

# Environmental Particulate Matter Levels During 2017 Large Forest Fires and Megafires in the Center Region of Portugal: A Public Health Concern?

Marta Oliveira <sup>1,\*</sup>, Cristina Delerue-Matos <sup>1</sup>, Maria Carmo Pereira <sup>2</sup> and Simone Morais <sup>1,\*</sup>

<sup>1</sup> REQUIMTE/LAQV, Instituto Superior de Engenharia do Instituto Politécnico do Porto, 4249-015 Porto, Portugal; cmm@isep.ipp.pt

<sup>2</sup> LEPABE, Departamento de Engenharia Química, Faculdade de Engenharia, Universidade do Porto, 4200-465 Porto, Portugal; mcsp@fe.up.pt

\* Correspondence: mrta.oliveira@graq.isep.ipp.pt (M.O.); sbm@isep.ipp.pt (S.M.); Tel.: +351 228340500 (S.M.)

**Table S1.** Annual burned area (ha) of forest in the eighteen districts of Portugal (2010-2017).

| Year  | North            |       |       |              | Center   |        |             |        |                   | South |        |          |        |         |                |       |      |           | Total  |
|-------|------------------|-------|-------|--------------|----------|--------|-------------|--------|-------------------|-------|--------|----------|--------|---------|----------------|-------|------|-----------|--------|
|       | Viana<br>Castelo | Braga | Porto | Vila<br>Real | Bragança | Aveiro | Coim<br>bra | Leiria | Castelo<br>Branco | Viseu | Guarda | Santarém | Lisboa | Setúbal | Portal<br>egre | Évora | Beja | Faro      |        |
| 2010  | 24246            | 14395 | 8552  | 18466        | 4771     | 8299   | 1486        | 1247   | 1253              | 19331 | 25736  | 1199     | 824    | 2263    | 218            | 472   | 229  | 104       | 133090 |
| 2011  | 5606             | 7510  | 4770  | 14263        | 11137    | 2675   | 588         | 2123   | 3156              | 7402  | 11556  | 425      | 1397   | 211     | 164            | 490   | 221  | 119       | 73813  |
| 2012  | 2917             | 8931  | 3664  | 6980         | 14824    | 2691   | 5649        | 2495   | 2018              | 15445 | 10219  | 7804     | 1738   | 361     | 1177           | 341   | 795  | 2218<br>3 | 110232 |
| 2013  | 12451            | 12025 | 14087 | 23209        | 23097    | 3224   | 3184        | 2329   | 3119              | 42009 | 9818   | 636      | 904    | 480     | 788            | 291   | 577  | 530       | 152758 |
| 2014  | 929              | 766   | 1362  | 1077         | 2274     | 313    | 1302        | 84     | 304               | 1075  | 5306   | 249      | 281    | 360     | 2489           | 407   | 595  | 756       | 19929  |
| 2015  | 10031            | 7154  | 2527  | 5445         | 5264     | 3498   | 1709        | 1028   | 2817              | 6573  | 12016  | 2266     | 990    | 294     | 205            | 986   | 1182 | 427       | 64412  |
| 2016  | 31440            | 14709 | 13074 | 12350        | 7191     | 42344  | 2085        | 1198   | 2495              | 10413 | 11943  | 3888     | 607    | 372     | 982            | 282   | 417  | 5734      | 161523 |
| 2017* | 8551             | 11898 | 7687  | 15770        | 22029    | 11859  | 113839      | 38800  | 52721             | 46868 | 60038  | 35570    | 1275   | 2869    | 10922          | 454   | 1039 | 249       | 442418 |

\* Data retrieved from the provisional report [18].

**Table S2.** Data summary used in the World Health Organization AIRQ+ software.

| <b>AIRQ+ input data</b>                                          | <b>Coimbra</b> | <b>Leiria</b> | <b>Viseu</b> | <b>Castelo Branco</b> | <b>Santarém</b> |
|------------------------------------------------------------------|----------------|---------------|--------------|-----------------------|-----------------|
| <b>Social-demographic data <sup>a</sup></b>                      |                |               |              |                       |                 |
| Resident population                                              | 438228         | 287040        | 255780       | 82273                 | 239346          |
| Area size (km <sup>2</sup> )                                     | 4336           | 2449          | 3238         | 4615                  | 4275            |
| <b>Environmental data <sup>b</sup></b>                           |                |               |              |                       |                 |
| June - PM <sub>10</sub> (mean and range; µg/m <sup>3</sup> )     | 23 (9-85)      | 25 (7-70)     | 15 (5-48)    | 23 (3-68)             | 19 (7-49)       |
| June - PM <sub>2.5</sub> (mean and range; µg/m <sup>3</sup> )    | n.a.           | n.a.          | n.a.         | 7.6 (1-37)            | 8.8 (2-30)      |
| October - PM <sub>10</sub> (mean and range; µg/m <sup>3</sup> )  | 34 (18-39)     | 57 (3-705)    | 16 (5-45)    | 25 (2-67)             | 29 (9-82)       |
| October - PM <sub>2.5</sub> (mean and range; µg/m <sup>3</sup> ) | n.a.           | n.a.          | n.a.         | 7.5 (1-29)            | 14 (2-46)       |
| <b>Health end-points baseline incidences <sup>c</sup></b>        |                |               |              |                       |                 |
| External consultations in hospitals - medical pediatrics         | 37215          | 19144         | 13556        | 3102                  | 12066           |
| Urgencies in hospitals                                           | 367052         | 177399        | 200487       | 67300                 | 13716           |
| Total deaths of residents in Portugal                            | 5573           | 3177          | 3228         | 1346                  | 2975            |

<sup>a</sup> Social-demographic data is presented for the entire region where each district is included; data retrieved from Pordata (<https://www.pordata.pt/Subtema/Municipios/Popula%C3%A7%C3%A3o+Residente-214>);

<sup>b</sup> Overall monthly median values determined with the data retrieved from the environmental monitoring stations (Figures 6 and 7)

<sup>c</sup> Health end-points baseline incidences were retrieved from Pordata ([https://www.pordata.pt/Subtema/Municipios/Servi%C3%A7o+Nacional+de+Sa%C3%BAde+\(SNS\)-219](https://www.pordata.pt/Subtema/Municipios/Servi%C3%A7o+Nacional+de+Sa%C3%BAde+(SNS)-219));  
n.a. – information not available.

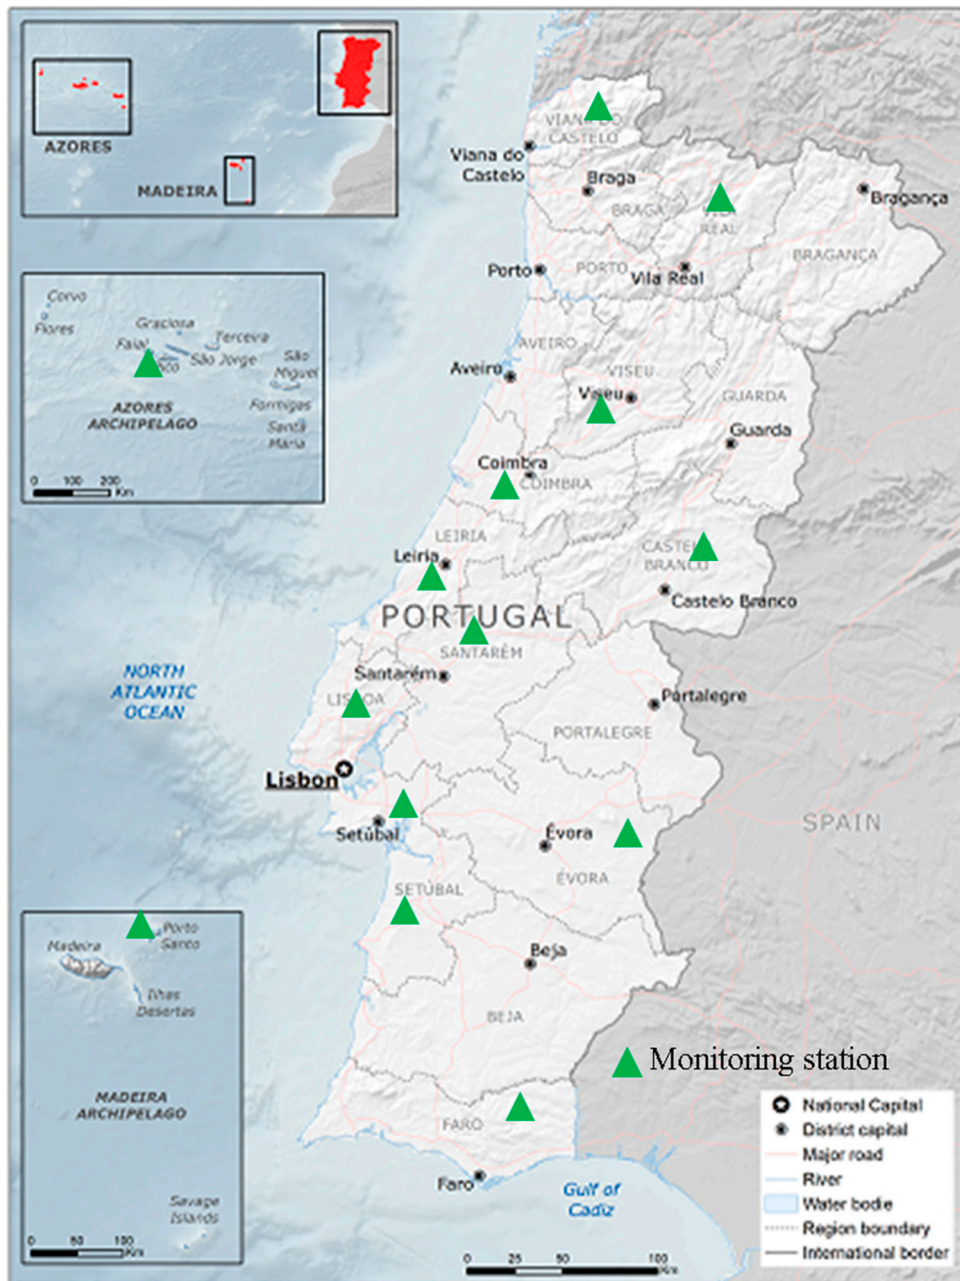

Source: <https://ercportal.jrc.ec.europa.eu/Maps/Base-maps-catalogue/mapId/2282/xmps/1708>.

**Figure S1.** Geographical localization of the rural monitoring stations with background influence in Portugal.

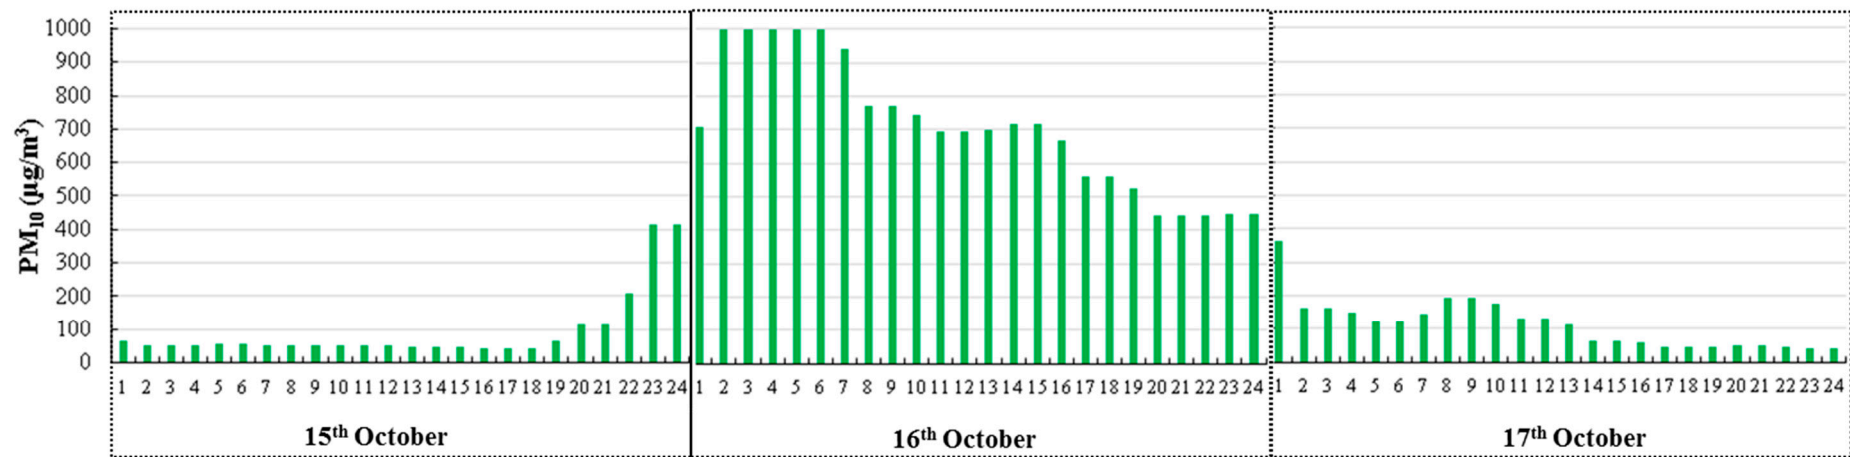

Figure S2. PM<sub>10</sub> hourly mean concentrations on October 15<sup>th</sup> to 17<sup>th</sup> at the rural monitoring station of Leiria.
